1 RESEARCH ARTICLE

2 **Impact of the COVID-19 pandemic on regional and national uptake of HIV testing services in**  
3 **Sierra Leone: a descriptive analysis**

4 Hannah Sheriff<sup>1</sup>; Ginika Egesimba<sup>2</sup>; Bailah Molleh<sup>3</sup>; Jarieu Tucker<sup>2</sup>; Gerald Younge<sup>2</sup>; Francis K.  
5 Tamba<sup>2</sup>; Sulaiman Lakoh<sup>3,4</sup>; Adrienne K. Chan<sup>5</sup>; Sharmistha Mishra<sup>5\*</sup>; Stephen Sevalie<sup>1,3,4\*</sup>

6 **Affiliations:**

7 <sup>1</sup>34 Military Hospital, Republic of Sierra Leone Armed Forces, Wilberforce, Freetown, Sierra Leone

8 <sup>2</sup>National AIDS Control Programme, Ministry of Health, Freetown, Sierra Leone

9 <sup>3</sup>Research and Scientific Division, Sustainable Health systems Sierra Leone, Freetown, Sierra  
10 Leone

11 <sup>4</sup>College of Medicine and Allied Health Sciences, University of Sierra Leone, Freetown, Sierra  
12 Leone

13 <sup>5</sup>Division of Infectious Diseases, Department of Medicine, Faculty of Medicine, University of  
14 Toronto, Toronto, Canada

15

16 Corresponding author: Sulaiman Lakoh ([lakoh2009@gmail.com](mailto:lakoh2009@gmail.com); +23278287492)

17 **Short title:** Impact of COVID-19 on Uptake of HIV testing services in Sierra Leone

18 \*Co-senior authorship

19

20

21

22

23

24 **Abstract**

25 **Background:** A key milestone in the reduction of the global HIV burden is reaching the UNAIDS  
26 95-95-95 target by 2025. The COVID-19 pandemic may have affected the ability of countries to  
27 achieve this target, but data to describe this impact is limited. This study assessed national HIV  
28 testing service uptake in Sierra Leone during three periods of the COVID-19 pandemic.

29 **Methods:** We conducted a retrospective cross-sectional study using secondary program data of  
30 all patients tested for HIV in all 16 districts of Sierra Leone. Data from March 2019 to February  
31 2020 (pre-COVID-19); March 2020 to February 2021 (during COVID-19); and March 2021 to  
32 February 2022 (post-COVID-19) were extracted from DHIS-2 and descriptive analyses were  
33 performed using Stata (15.1, StataCorp LLC, College Station, TX).

34 **Results:** The median number of HIV tests was 58,588 (IQR 54,232 to 62,077) in the pre-COVID  
35 phase, 55,141 (IQR 52,975 to 57,689) during the COVID-19 phase, and 74,954 (IQR 72,166 to  
36 76,250) in the post-COVID phase. This shows that HIV testing rate decreased by 6.3% during the  
37 COVID-19 period and increased substantially by 36.0% in the post-COVID-19 period. Twice more  
38 women than men were tested for HIV across all periods—pre-COVID-19 (38,825 vs. 19,789),  
39 during COVID-19 (36,923 vs. 17,755), and post-COVID-19 (49,205 vs. 25,472) phases.

40 **Conclusion:** Our study shows that HIV testing was significantly disrupted during the COVID-19  
41 pandemic but recovered quickly after the pandemic. These findings highlight that lessons learned  
42 from previous epidemics may influence adaptive strategies to maintain essential health services  
43 during public health emergencies.

44 **Key words:** HIV testing, HIV testing services, COVID-19, COVID-19 pandemic, Sierra Leone

45

## 46 **Introduction**

47 A key milestone in the reduction of the global burden of HIV is reaching the UNAIDS 95-95-95  
48 target by 2025; 95% of all people living with HIV know their status, 95% of all people diagnosed  
49 with HIV receive sustained antiretroviral therapy and 95% of all people receiving antiretroviral  
50 therapy have viral suppression [1]. This global goal of controlling the epidemic has been severely  
51 impacted by the COVID-19 pandemic, particularly in low- and middle-income countries [2]. There  
52 are many factors that affect health service delivery during the pandemic. Lockdown and travel  
53 restrictions, supply chain disruptions, changes in health-care-seeking behaviors, reductions or  
54 closures of facility services, redeployment of health-care staff and limited community  
55 engagement have all led to disruptions in essential services [3, 4].

56 HIV testing remains the main entry point to HIV care and treatment, and its interruption can  
57 jeopardize the entire care continuum [ 5]. Data from 502 health facilities in 32 countries in Africa  
58 and Asia showed a significant decrease in HIV testing services (41%) and HIV referrals (37%) due  
59 to the COVID-19 pandemic [2].

60 Sierra Leone has a population of 7.5 million, and an estimated 77,273 people living with HIV, a  
61 prevalence of 1.73% [6]. Key populations, such as female sex workers, have the highest HIV  
62 infection rates [6,7]. There are geographic disparities in HIV infection rates in Sierra Leone, with  
63 higher rates in urban areas than in rural areas [7].

64 The COVID-19 pandemic may have affected the country's progress towards epidemic control in  
65 2025. As of December 2023, only 83% of people living with HIV had been diagnosed [7]. Similar  
66 disruptions to HIV testing services were reported during the 2014/2016 Ebola outbreak, and  
67 these effects may have continued until the COVID-19 pandemic in March 2020 [8].

68 The National AIDS Control Program, in collaboration with partners, rapidly implemented a  
69 mitigation strategy to ensure continued access to HIV testing amid the challenges posed by the  
70 COVID-19 pandemic. This strategy included the formulation of guidelines for integrating HIV  
71 testing services in the centers providing COVID-19 services, scaling up HIV testing services in  
72 COVID-19 treatment facilities, implementing COVID-19 symptom screening as a prerequisite for  
73 accessing HIV services, and imposing a temporary suspension on community-based testing.  
74 Given the differences in health service delivery and human resources across regions, the impact  
75 of these adaptive measures to the utilization of essential health services is expected to vary from  
76 region to region. However, a comprehensive evaluation of the effectiveness of these  
77 interventions in mitigating the impact of COVID-19 on HIV testing services at national and sub-  
78 national levels in Sierra Leone has not yet been conducted.  
79 Our study aimed to understand the geographic variation of the impact of COVID-19 on the HIV  
80 testing service uptake amongst persons aged 15-49 across the five given regions of Sierra Leone  
81 by comparing three-time periods: pre- COVID-19, during, and post-COVID-19.

## 82 **Methods**

### 83 ***Study design and setting***

84 We conducted a retrospective cross-sectional study using aggregated secondary program data  
85 for all patients who were tested for HIV in public and private health facilities across all the 16  
86 districts in Sierra Leone.

87 The 16 districts are aggregated and administered into five regions: Eastern (Kailahun, Kenema,  
88 and Kono Districts), Western Area (Urban and Rural Districts), Northern (Bombali, Falaba,  
89 Koinadugu, and Tonkolili Districts), Northwestern (Kambia, Karene, and Port Loko Districts) and,

90 Southern (Bo, Bonthe, Moyamba, Pujehun Districts) regions. HIV testing services are provided in  
91 960 primary, secondary and tertiary health facilities across the 16 districts by the National AIDS  
92 Control Program of the Ministry of Health. Key HIV testing approaches implemented by the  
93 program consists of HIV counseling and testing, provider-initiated testing and counseling, index  
94 case testing, community-based testing and HIV self-testing.

#### 95 ***Data sources and variables***

96 Data for this study was extracted on October 2, 2024 from the DHIS-2, a national health  
97 management information systems database consisting of secondary de-identified, aggregated  
98 data reported monthly from the health facilities providing HIV testing services into a Microsoft  
99 Excel. Patient-level data collected daily during service provision was entered into standardized  
100 data collection tools aligned with nationally developed reportable data elements and indicators,  
101 with quality assurance provided by the district and national monitoring and evaluation systems.  
102 We extracted monthly data from March 2019 to February 2022 to capture seasonal variations in  
103 service utilization and reflect HIV testing services over three time periods: March 2019 to  
104 February 2020 (before the COVID-19 pandemic); March 2020 to February 2021 (during the  
105 COVID-19 pandemic); March 2021 to February 2022 (post-COVID-19 pandemic). Variables  
106 extracted included number of people tested per month, gender, region, and region.

#### 107 ***Data management and analysis***

108 Data in Excel format was cleaned, coded, and validated prior to analysis. We visualized national  
109 and regional variations in patterns in HIV testing services uptake before, during, and post-COVID-  
110 19 pandemic. We reported the median and inter-quartile range in monthly HIV testing services

111 uptake by time periods at the national level for the total population, and stratified by gender  
112 using Stata (15.1, StataCorp LLC, College Station, TX).

### 113 **Ethics**

114 Ethical approval was obtained from the Sierra Leone Ethics and Scientific Review Committee of  
115 the Ministry of Health Board with approval number 016/05/2023. Routine data were abstracted  
116 under a waiver of informed consent. The authors did not have access to information that could  
117 identify individual participants during or after data collection.

### 118 **Results**

#### 119 **Summary of the uptake of HIV testing services**

120 The median number of HIV tests was 58,588 (IQR 54,232 to 62,077) in the pre-COVID phase,  
121 55,141 (IQR 52,975 to 57,689) during the Covid-19 phase, and 74,954 (IQR 72,166 to 76,250) in  
122 the post-COVID phase. This shows that HIV testing rates decreased by 6.3% during the COVID-19  
123 period and increased substantially by 36.0% in the post-COVID-19 period. Gender differences in  
124 the uptake of HIV testing were reported in all three phases of testing. Across all periods — before  
125 COVID-19 (38,825 vs. 19,789), during COVID-19 (36,923 vs. 17,755) and after COVID (49,205 vs.  
126 25,472), women consistently received about twice as many tests as men. Nevertheless, both  
127 genders have seen similar drops in HIV testing during the COVID-19 pandemic (**Table 1**).

128

129 **Table 1: Summary of the uptake of HIV testing services over three-time periods in Sierra Leone**  
130 **(March 2019 to February 2022)**

| HTS Uptake per month | Pre-COVID<br>Mar 2019 to Feb 2020 | During COVID<br>Mar 2020 to Feb 2021 | Post-COVID<br>Mar 2021 to Feb 2022 |
|----------------------|-----------------------------------|--------------------------------------|------------------------------------|
|----------------------|-----------------------------------|--------------------------------------|------------------------------------|

|        | 12 months |                | 12 months |                | 12 months |                |
|--------|-----------|----------------|-----------|----------------|-----------|----------------|
|        | Median    | (IQR)          | Median    | (IQR)          | Median    | (IQR)          |
| Total  | 58588     | (54232, 62077) | 55141     | (52975, 57689) | 74954     | (72166, 76250) |
| Male   | 19,789    | (19204, 21659) | 17,755    | (17474, 19692) | 25,472    | (24522, 26044) |
| Female | 38,825    | (34883, 4041)  | 36,923    | (35451, 38465) | 49,205    | (47626, 50514) |

131

132 **Variation in the number of HIV testing services across gender and different time periods of the**  
 133 **COVID-19 pandemic**

134 The use of HIV testing services increased steadily before the pandemic, but this trend suddenly  
 135 dropped at the beginning of the pandemic. However, during the early part of the COVID-19  
 136 pandemic, there was a sharp increase in HIV testing services (**Figure 1**). HIV testing rates among  
 137 women are approximately twice as high as among men (**Figure 2**).

138 **Variation in HIV testing services by region**

139 There were minimal geospatial variations in the utilization of HIV testing services in the East,  
 140 North, South, and Northwestern Regions across the different periods of COVID-19 pandemic. In  
 141 contrast, the Western Area, characterized as the most urbanized part of Sierra Leone, exhibited  
 142 a notable decrease in HIV testing just before the start of COVID-19 (**Figure 3**). The utilization of  
 143 the HIV testing services in the Western Area Urban was highly variable, highlighting pronounced  
 144 fluctuations attributed to COVID-19 pandemic (**Figure 4**).

145 **Discussion**

146 We assessed the uptake of HIV testing services over a period ranging from pre COVID-19  
 147 pandemic to the post- COVID-19 era. Our results have revealed crucial patterns in the uptake  
 148 HIV testing in the context of health system’s reactions to stress and adaptations. First, our results  
 149 show an acute decline in the uptake of HIV testing services nationwide just before the first case

150 of COVID-19 was reported in Sierra Leone. Second, urban areas were most affected, with  
151 Western Area Urban experiencing the most decline in HIV testing services uptake. Third, there  
152 was gender disparity in the utilization of HIV testing services. Finally, women use HIV testing  
153 services about twice as much as men but the decline in testing during the COVID-19 pandemic  
154 was similar for both sexes.

155 We found a decline in HIV testing uptake during the COVID-19 pandemic of 6.5%. Studies across  
156 low and middle-income countries have confirmed that the COVID-19 pandemic reduced HIV  
157 testing uptake among people living with HIV, but data to describe this effect in Sierra Leone is  
158 limited. In three facilities across the three different levels in the Western Sierra Leone, HIV testing  
159 services declined by 41% during the COVID-19 pandemic [9]. Our findings and the one reported  
160 in this formative study reflects on the global pattern of COVID-19 interruptions of health services.  
161 A study conducted by AIDS Health Care Foundation across four continents demonstrated a  
162 reduction in HIV service delivery across the continuum of care, including testing [10]. Research  
163 on the uptake of HIV testing services in Nigeria showed a significant decrease in uptake and  
164 linkage to care [11]. A study in India described a component of HIV testing services; index case  
165 testing revealed reduced service uptake and increased service cost [12].

166 Several factors could have explained the reasons for the decline in HIV testing services. One of  
167 the factors contributing to the acute decline in HIV testing services was the industrial action by  
168 health workers, which was reported during the COVID-19 pandemic as health workers demand  
169 for risk allowance and other compensations in response to the pandemic. This situation is not  
170 unique to Sierra Leone. In Kenya, a national strike by health workers resulted in significant  
171 reductions in essential services such as hospital deliveries and caesarean sections in public  
172 hospitals during the COVID-19 pandemic [13]. Therefore, we call for investment in the health  
173 workforce as part of health system building strategy to prevent the disruptions in service delivery  
174 in future public health emergencies.

175 The temporary suspension of index case HIV testing to mitigate the spread of COVID-19 may have  
176 led to a decline in HIV testing services. Incorporating HIV testing into COVID-19 treatment centers



177 may have helped offset this reduction, but due to the low number of COVID-19 cases in Sierra  
178 Leone, HIV testing services were still disrupted by the pandemic.

179 HIV testing recovered rapidly in the wake of the COVID-19 pandemic, which can be attributed to  
180 the adaptive measures taken during the pandemic. These observations suggest that health  
181 systems have the resilience to quickly adapt to shocks and restore essential services to pre-  
182 pandemic levels [14]. Experience with past epidemics, particularly the Ebola outbreak, and  
183 differences in population dynamics are critical considerations when developing emergency  
184 response plans [15]. Building a strong health system is important to reduce a country's  
185 vulnerability to public health emergencies and ensures a high level of preparedness to mitigate  
186 the impact of any crises. Sierra Leone's ability to rapidly bounce back from health system shock  
187 and maintain HIV services amidst multifaceted health systems challenges underscores the  
188 evolution of resilience in its healthcare system. Our findings highlight broader lessons for global  
189 health, underscoring the importance of integrated and resilient health systems that are able to  
190 manage multiple health threats simultaneously while ensuring equitable access to essential  
191 services for all populations, especially in times of crisis.

192 We report regional differences in service provision. HIV testing services in urban areas, especially  
193 in the Western Area Urban, have been more affected than in provincial or rural areas. This  
194 difference may explain why HIV testing services have changed little or not significantly in rural  
195 areas compared with urban areas. Community behavior and engagement strategies differed  
196 between urban and rural areas: urban areas used mainly electronic, print and social media for  
197 health promotion, while rural areas benefited from road shows and direct community  
198 engagement, with relatively high degrees of impact on the effectiveness of these approaches.

199 There were more stricter restrictions in the Western Area compared to other regions. Finally, in  
200 rural areas, the provision of health services depends not only on clinic visits but also on home  
201 services provided by community health workers [16].

202 Women are particularly vulnerable to the impact of the COVID-19 pandemic [17]. Although more  
203 women than men undergo HIV testing in our study, the impact of the epidemic on HIV testing did  
204 not differ.

205 Our findings have limitations inherent to operational research using secondary data. There is  
206 limited reporting on DHIS2 for private hospitals. Therefore, the findings reported in this study are  
207 not representative of the impact of COVID-19 on HIV testing services in private settings in Sierra  
208 Leone. Importantly, we used secondary data in DHIS2 and could not control the quality of data  
209 input into this database. The use aggregate data limited our ability to analyse relevant variables  
210 such as age groups and sub-populations. Finally, we have not been able to determine cause and  
211 effect relationships of the impact of COVID-19 on HIV testing services.

212 Despite these limitations, there are several strengths of this study. First, we analyzed data  
213 generated from all regions and districts in Sierra Leone to make our findings nationally  
214 representative. Second, because the data we used were collected during routine operations and  
215 were not influenced by any induced observations during the collection period, they provide a fair  
216 reflection of the performance of the Sierra Leone health system under stress. Finally, while most  
217 studies focus on only the pandemic period, our study extends the scope to a broader timeline,  
218 covering the pre-, during-, and post-COVID-19 pandemic phases. Thus, adding to the burden of  
219 evidence that calls for the protection of essential health services during public health  
220 emergencies.

221 **Conclusion:** Our findings highlight that HIV testing was significantly disrupted during the COVID-  
222 19 pandemic but recovered quickly after the pandemic. These findings highlight the lessons  
223 learned from previous epidemics and the importance of adaptive strategies to maintain essential  
224 health services during public health emergencies. Future research should explore the specific  
225 factors that influence health system adaptability and resilience in the context of a public health  
226 emergency to inform effective public health interventions and policies.

227

## 228 **Declaration section**

229 The authors declared no conflict of interest

## 230 **Acknowledgements**

231 SM is supported by a Tier 2 Canada Research Chair in Mathematical Modeling and Program  
232 Science.

233 **Funding:** This study was conducted with support from the Canadian Institute of Health Research:  
234 (grant number: CIHR: WI1-179883).

235 **Conflict of interest:** None to declare

236 **Author's contribution:**

237 Conceptualization and study design: HS, GE, and SL

238 Data curation and validation: BM, FKT, JT

239 Methodology and formal analysis: HS, SM and GE

240 Funding acquisition, resources, supervision: SS, SL, SM, ACK

241 Writing – original draft preparation: HS, SS, ACK and GY

242 Writing – review & editing: SL, ACK and SM

243 **Availability of data:** The datasets (<https://doi.org/10.5061/dryad.3r2280gsp>) used and/or  
244 analyzed for this study are available from:  
245 <http://datadryad.org/stash/share/A7iknhOneWpaUg4eUBL3fuO8Dcmgpjm31FFVZwtacf8>.

## 246 **References**

- 247 1. Frescura L, Godfrey-Faussett P, Feizzadeh A A, El-Sadr W, Syarif O, Ghys PD; on and behalf  
248 of the 2025 testing treatment target Working Group. Achieving the 95 95 95 targets for  
249 all: A pathway to ending AIDS. PLoS One. 2022 Aug 4;17(8):e0272405. doi:  
250 10.1371/journal.pone.0272405. PMID: 35925943; PMCID: PMC9352102.
- 251 2. Impact of COVID-19 on HIV, TB and Malaria and systems for health—a Global Fund for  
252 HIV, TB and Malaria snapshot report. Available  
253 at: [https://www.theglobalfund.org/media/10776/covid-19\\_2020-disruption-](https://www.theglobalfund.org/media/10776/covid-19_2020-disruption-impact_report_en.pdf)  
254 [impact\\_report\\_en.pdf](https://www.theglobalfund.org/media/10776/covid-19_2020-disruption-impact_report_en.pdf). Accessed 20 September 2024.

- 255 3. Global Fund Advocates Network (GFAN). Global Fund to Fight AIDS, Tuberculosis, and  
256 Malaria: Advocacy Report 2021 [Internet]. Global Fund Advocates Network; 2021 [cited  
257 2024 Jun 8]. Available from:  
258 [https://www.globalfundadvocatesnetwork.org/report/global-fund-advocacy-report-](https://www.globalfundadvocatesnetwork.org/report/global-fund-advocacy-report-2021)  
259 [2021](https://www.globalfundadvocatesnetwork.org/report/global-fund-advocacy-report-2021)
- 260 4. Murphy T, Brown R, Smith J, Johnson A. Examining the impact of COVID-19 on ART uptake  
261 in Sub-Saharan Africa. *Global Health Journal*. 2022;15(4):235-250.  
262 <https://doi.org/10.1016/j.ghj.2022.05.003>.
- 263 5. Bayani A, Ghiasvand H, Rezaei O, Fattah Moghaddam L, Noroozi A, Ahounbar E, Higgs P,  
264 Armoon B. Factors associated with HIV testing among people who inject drugs: a meta-  
265 analysis. *J Addict Dis*. 2020 Jul-Sep;38(3):361-374. doi: 10.1080/10550887.2020.1771235.  
266 Epub 2020 Jun 18. PMID: 32552504.
- 267 6. UNAIDS Facts sheet (2023)-Available at:  
268 <https://www.unaids.org/en/regionscountries/countries/sierraleone>. Accessed  
269 September 20, 2024.
- 270 7. SLDHS. (2019). *Sierra Leone Demographic and Health Survey 2019. Freetown, Sierra*  
271 *Leone, and Rockville, Maryland, USA: Stats SL and ICF*. Accessed on:  
272 <https://www.statistics.sl/images/StatisticsSL/Documents/DHS2018/sldhs2019kir.pdf>.
- 273 8. Gamanga AH, Owiti P, Bhat P, Harries AD, Kargbo-Labour I, Koroma M. The Ebola  
274 outbreak: effects on HIV reporting, testing and care in Bonthe district, rural Sierra Leone.  
275 *Public Health Action*. 2017 Jun 21;7(Suppl 1): S10-S15. doi: 10.5588/pha.16.0087. PMID:  
276 28744433; PMCID: PMC5515556.
- 277 9. Lakoh S, Firima E, Jiba DF, Sesay M, Conteh MM, Deen GF. Low partner testing in high HIV  
278 prevalence setting in Freetown, Sierra Leone: a retrospective study. *BMC Research Notes*.  
279 2019 Dec; 12:1-6.

- 280 10. Rick F, Odoke W, van den Hombergh J, Benzaken AS, Avelino-Silva VI. Impact of  
281 coronavirus disease (COVID-19) on HIV testing and care provision across four continents.  
282 HIV medicine. 2022 Feb;23(2):169-7.
- 283 11. Katbi M, Adegboye AA, Bello M, Gumel AG, Adedoyin A, Yunusa F, Kayode G, Yusuf OB,  
284 Anjorin A, Abone CG, Ukaere A. Effect of community treatment initiative on antiretroviral  
285 therapy uptake among linkage-resistant people living with HIV in Northern Nigeria.  
286 International Journal of Infectious Diseases. 2019 Oct 1; 87:185-92.
- 287 12. Pollard R, Enugu A, Sriudomporn S, Bell J, Ghosh SC, Arumugam V, Mugundu P, Singh A,  
288 McFall AM, Mehta SH, Patenaude BN, Solomon SS. COVID-19 impact on index testing  
289 services and programmatic cost in 5 high HIV prevalence Indian districts. BMC Infect Dis.  
290 2022 Dec 8;22(1):918. doi: 10.1186/s12879-022-07912-3. Erratum in: BMC Infect Dis.  
291 2022 Dec 22;22(1):955. doi: 10
- 292 13. Wambua S, Malla L, Mbevi G, Nwosu AP, Tuti T, Paton C, Cheburet S, Manya A, English M,  
293 Okiro EA. The indirect impact of COVID-19 pandemic on inpatient admissions in 204  
294 Kenyan hospitals: An interrupted time series analysis. PLOS Glob Public Health. 2021 Nov  
295 17;1(11):e0000029. doi: 10.1371/journal.pgph.0000029. PMID: 36962093; PMCID:  
296 PMC10021711.1186/s12879-022-07949-4. PMID: 36482363; PMCID: PMC9733361.
- 297 14. Kieny MP, Evans DB, Schmetts G, Kadandale S. Health-system resilience: reflections on the  
298 Ebola crisis in western Africa. Bull World Health Organ. 2014 Dec 1;92(12):850. doi:  
299 10.2471/BLT.14.149278. PMID: 25552765; PMCID: PMC4264399.
- 300 15. Ministry of Health and Sanitation. Government of Sierra Leone Ebola Viral Disease  
301 Situation Report: Available at  
302 : [https://reliefweb.int/sites/reliefweb.int/files/resources/Ebola-Situation-Report\\_Vol-](https://reliefweb.int/sites/reliefweb.int/files/resources/Ebola-Situation-Report_Vol-260.pdf)  
303 [260.pdf](https://reliefweb.int/sites/reliefweb.int/files/resources/Ebola-Situation-Report_Vol-260.pdf). Accessed on September 20, 2024.
- 304 16. Kallon LH, Raven J, Wurie HR, Mansour W. From policy to practice: a qualitative study  
305 exploring the role of community health workers during the COVID-19 response in Sierra

306 Leone. BMC Health Serv Res. 2023 Nov 9;23(1):1228. doi: 10.1186/s12913-023-10272-6.  
307 PMID: 37946253; PMCID: PMC10634028.

308 17. Kumar N, Mangla M. Influence of paired pandemic of COVID-19 and HIV infection on  
309 pregnant women and children: a challenging issue. *J Mother Child*. 2022;25(2):123–126.  
310 doi: 10.34763/jmotherandchild.20212502.d-21-00017.

311

312

313

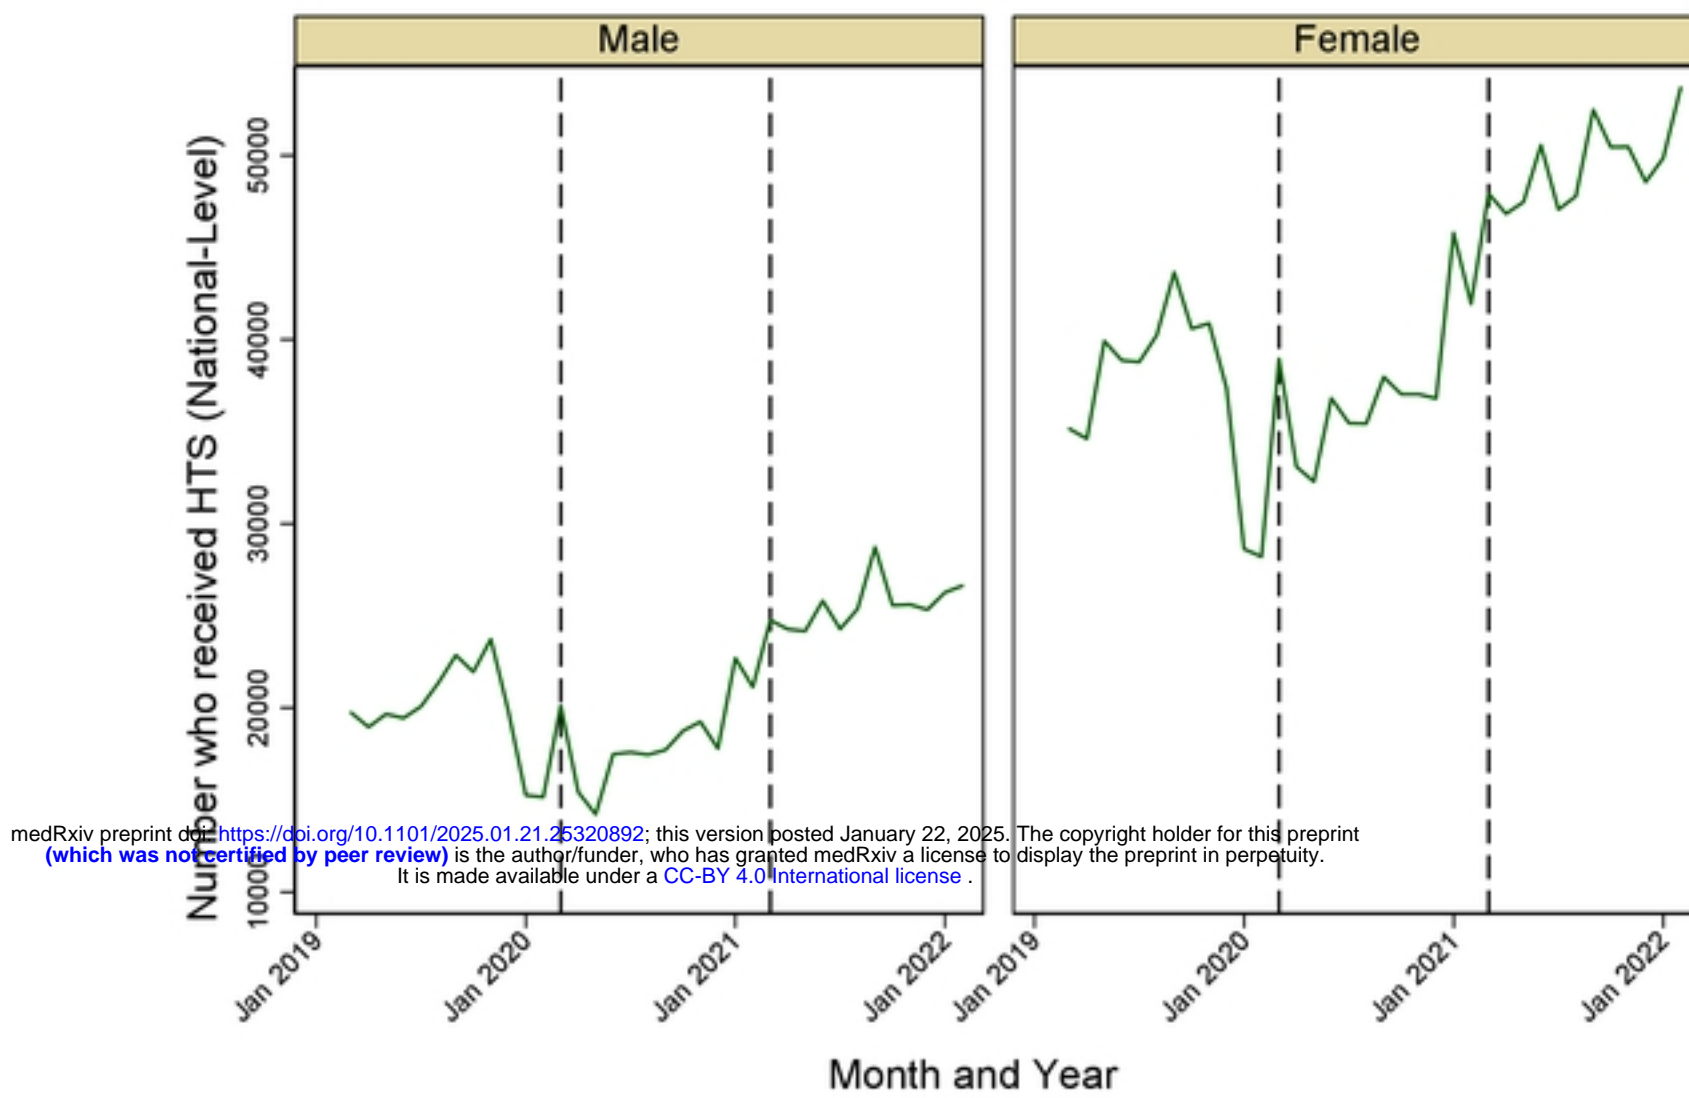

**Figure 2: Variation in HIV testing during the COVID period by gender**

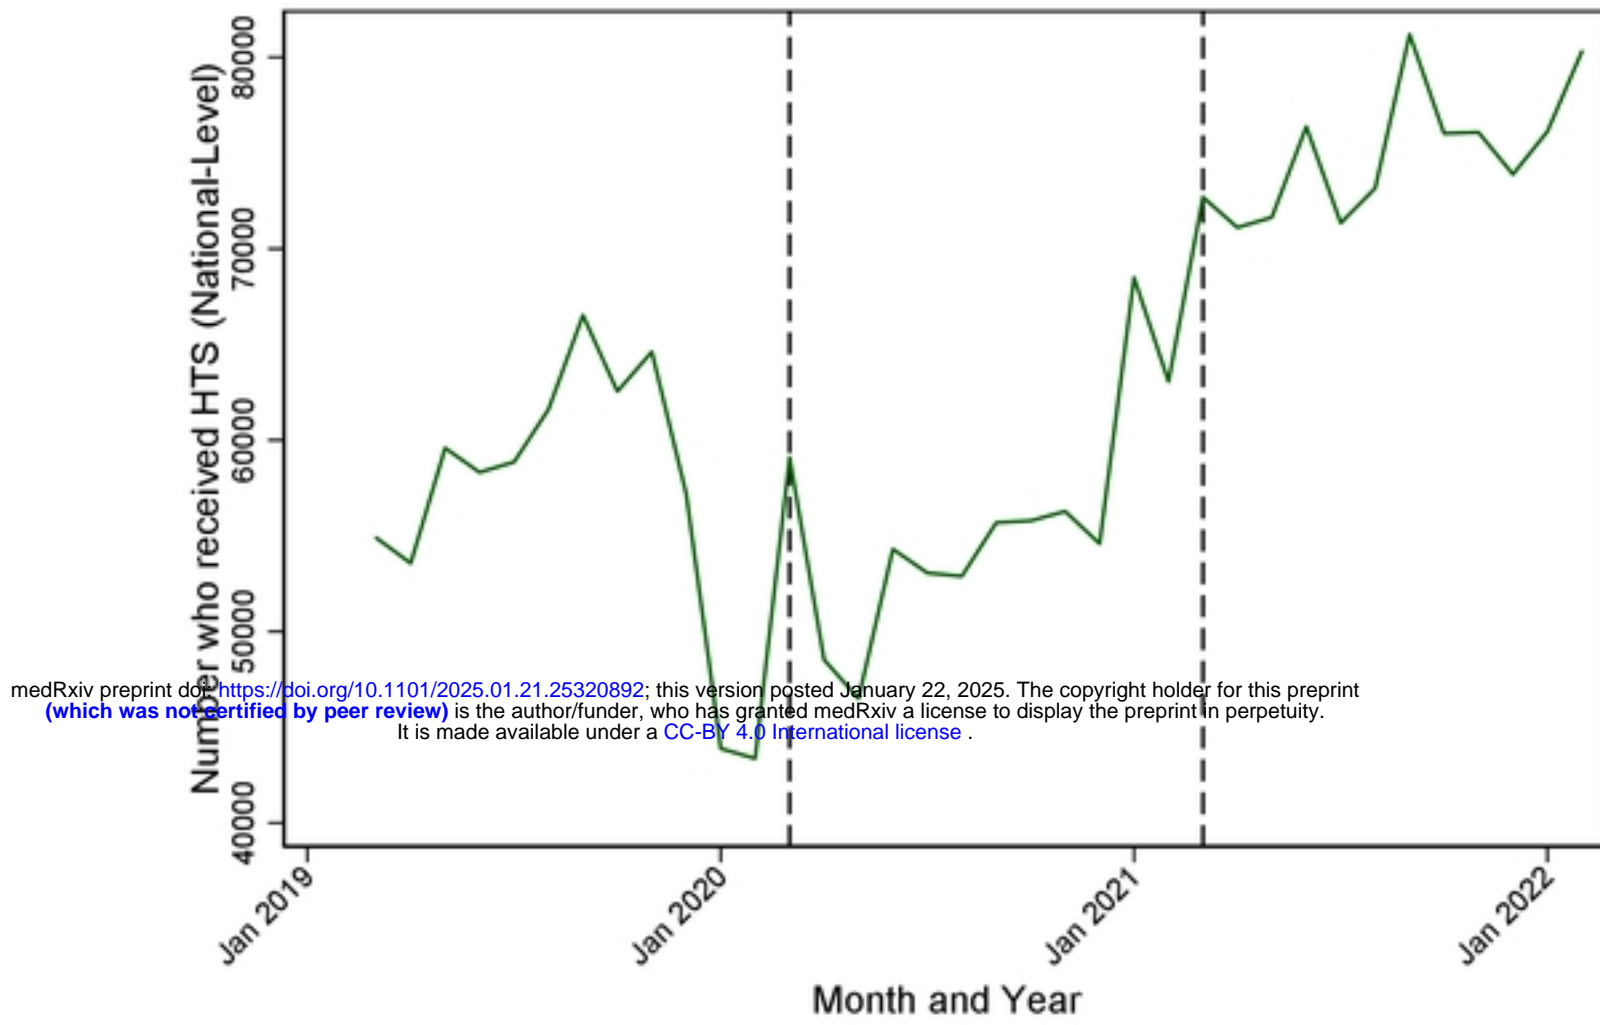

**Figure 1: National HIV testing services uptake in three time periods**



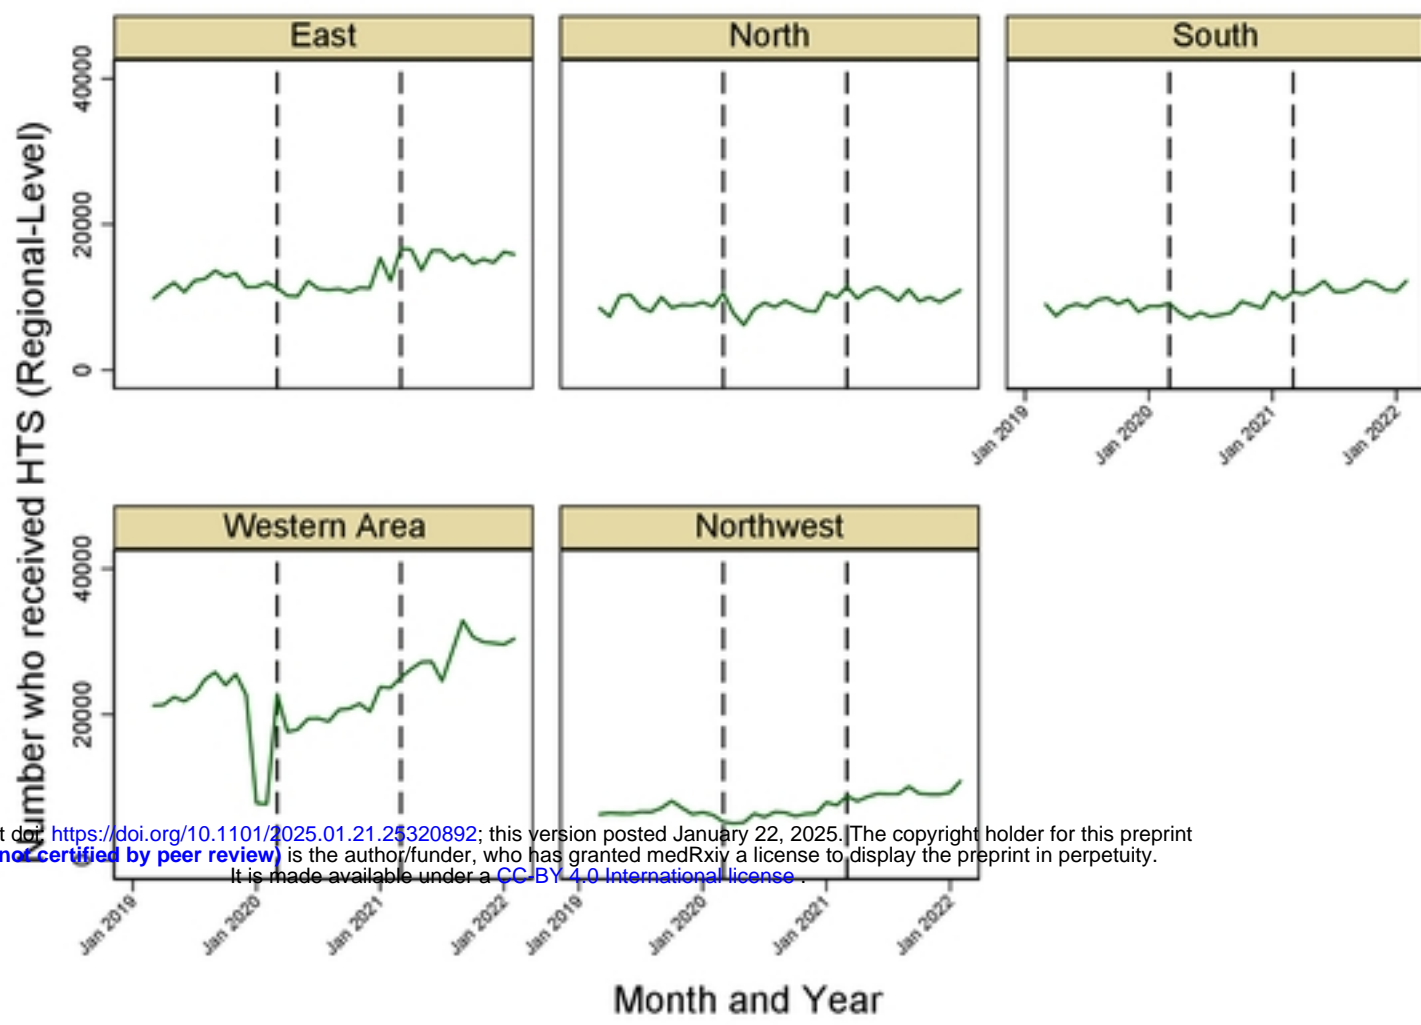

**Figure 3: Uptake of HIV testing services by region**

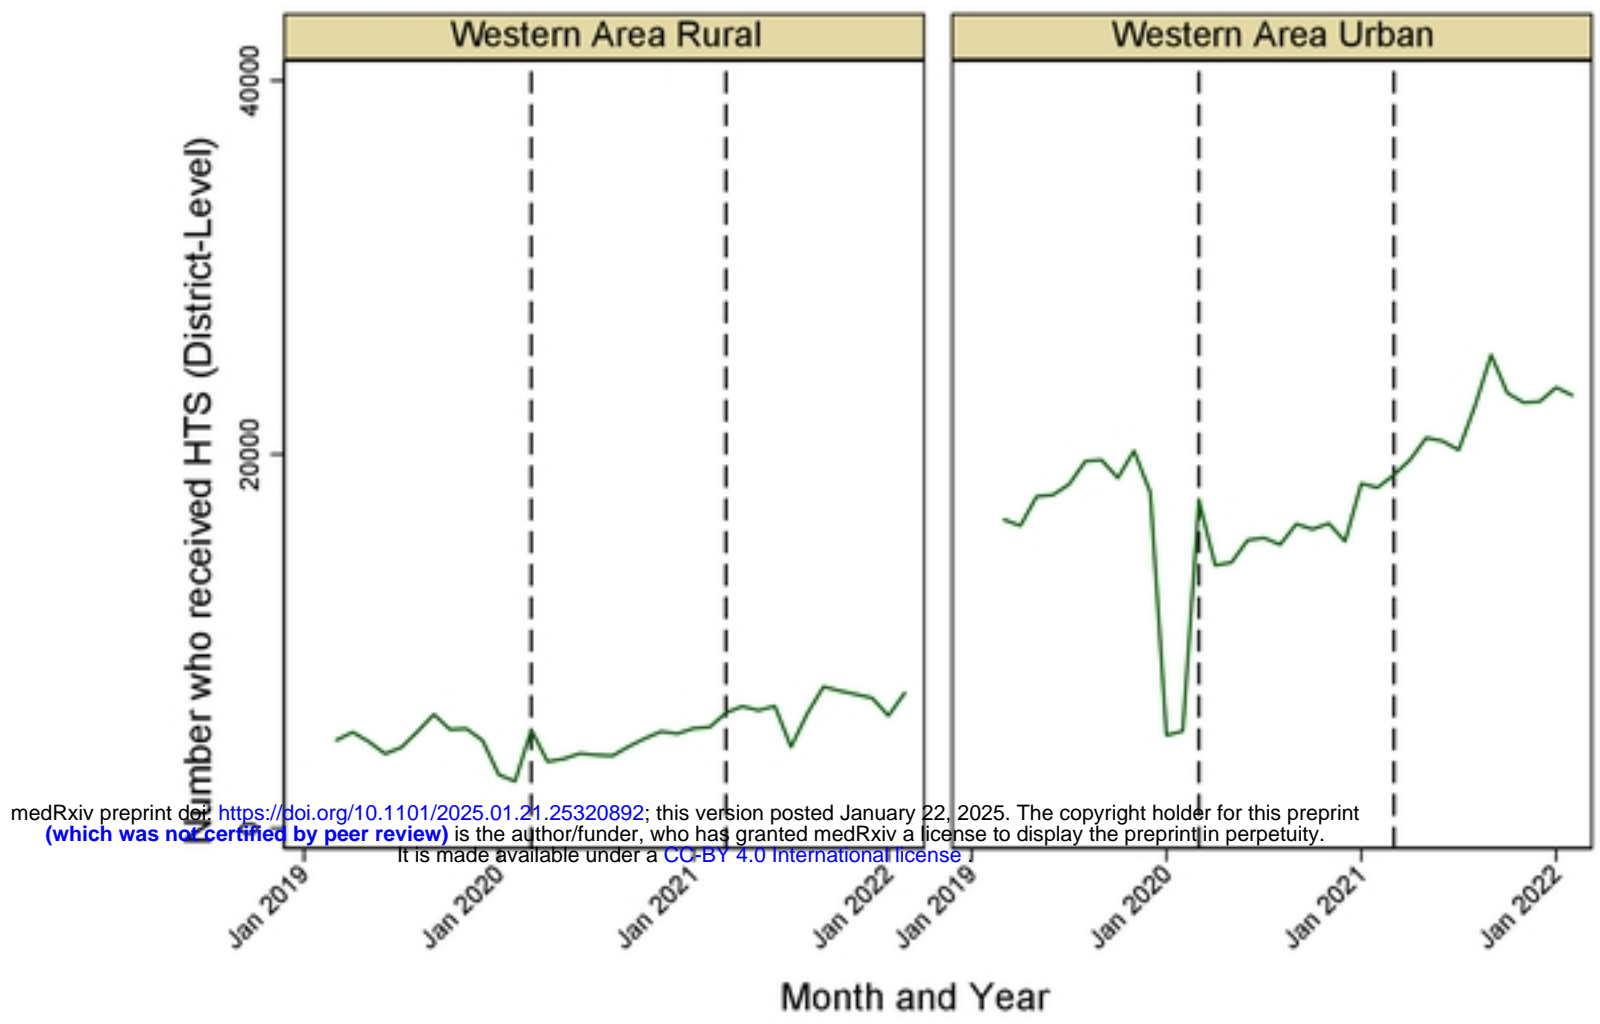

**Figure 4:** Variation in the utilization of HIV testing services across Western Urban and Western Rural
